# Supplementary material for: Wind-Ramp Predictability
Source: MDPI journal article supplement (doi:10.3390/atmos13030453), 2022-03-11
Supplement: s1 [file s1]

Archive with 1 entries (1 files):
- atmosphere-1553637-supplementary.pdf
